# Supplementary material for: Synthesis and photocatalysis performances of bismuth oxynitrate photocatalysts with layered structures
Source: Royal Society of Chemistry journal article supplement (doi:10.1039/c4cp01489h), 2014-07-02

# Synthesis and Photocatalysis Performances of Bismuth Oxynitrate Photocatalysts with Layered Structure

*Bin Lu<sup>a,b</sup>, Yongfa Zhu<sup>\*a</sup>*

a. Department of Chemistry, Tsinghua University, Beijing, 100084, P. R. China

b. Shanghai Municipal Engineering Design Institute, Shanghai 200092, PR China

**Fig. S1.** Powder diffraction patterns of as-prepared goffered particle samples (0.8 g, the precursor pH = 1.22) with or without suspended in 9 mL of 1 M NaOH solution for 120 min

**Fig. S2.** Powder diffraction patterns of as-prepared bismuth oxynitrate calcined in air under different temperature for 2h.

**Fig. S3.** The crystal structures of layered bismuth oxynitrate,  $\text{Bi}_5\text{O}_7\text{NO}_3$ , and  $\beta\text{-Bi}_2\text{O}_3$ .

**Fig. S4.** Plots of the recycled degradation of methyl blue in the square multi-layered particle sample as a function of the irradiation period.

Fig. S1

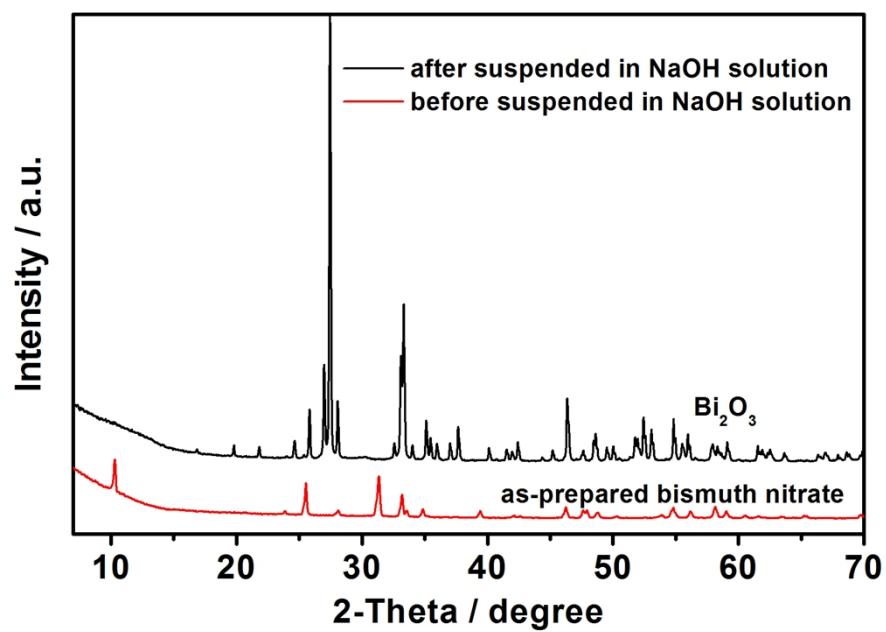

**Fig. S2**

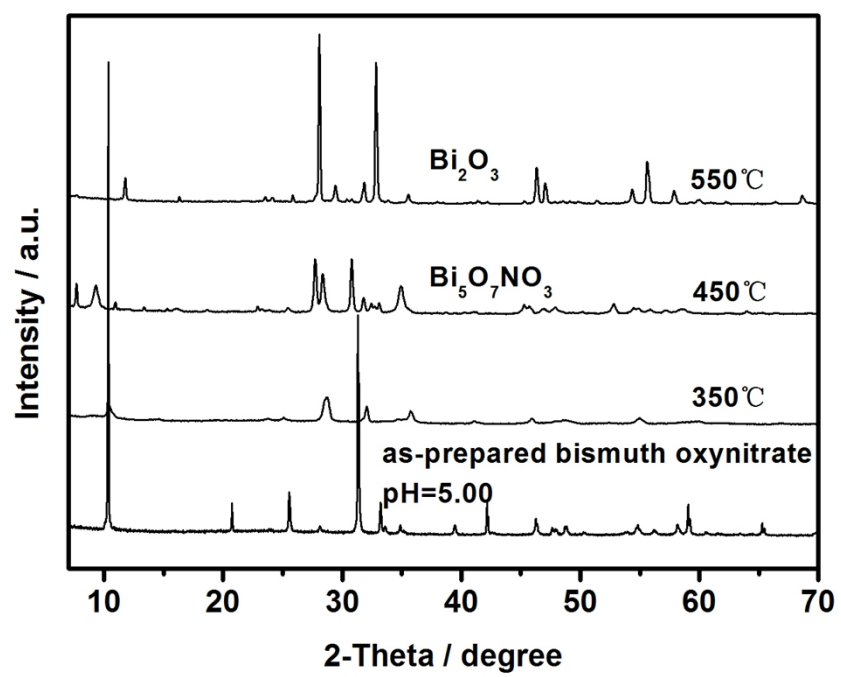

**Fig. S3**

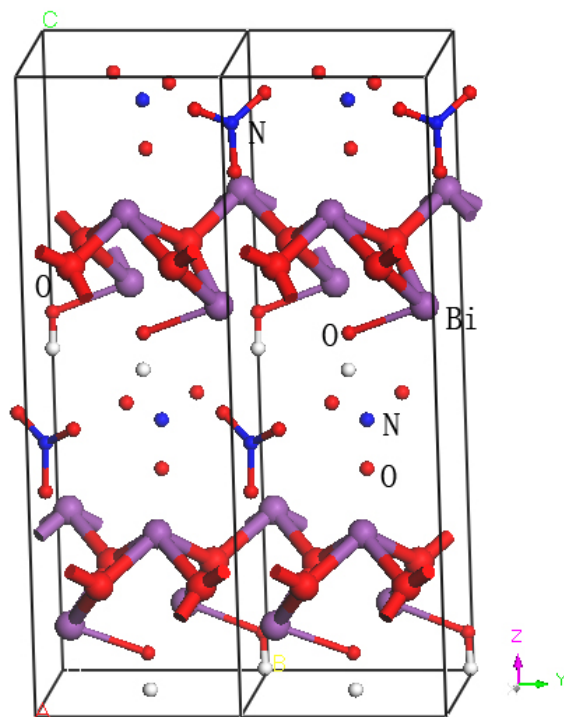

(a) Layered crystal structure of layered bismuth oxynitrate

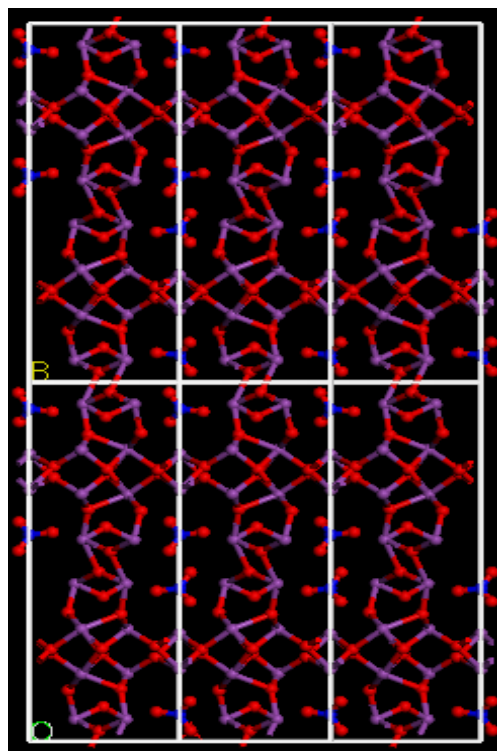

(b) Crystal structure of  $\text{Bi}_5\text{O}_7\text{NO}_3$

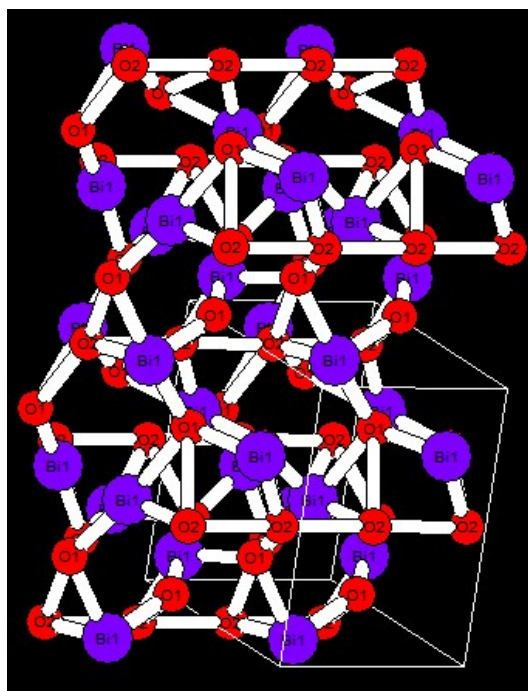

(c) Reticular crystal structure of  $\text{Bi}_2\text{O}_3$

**Fig. S4**

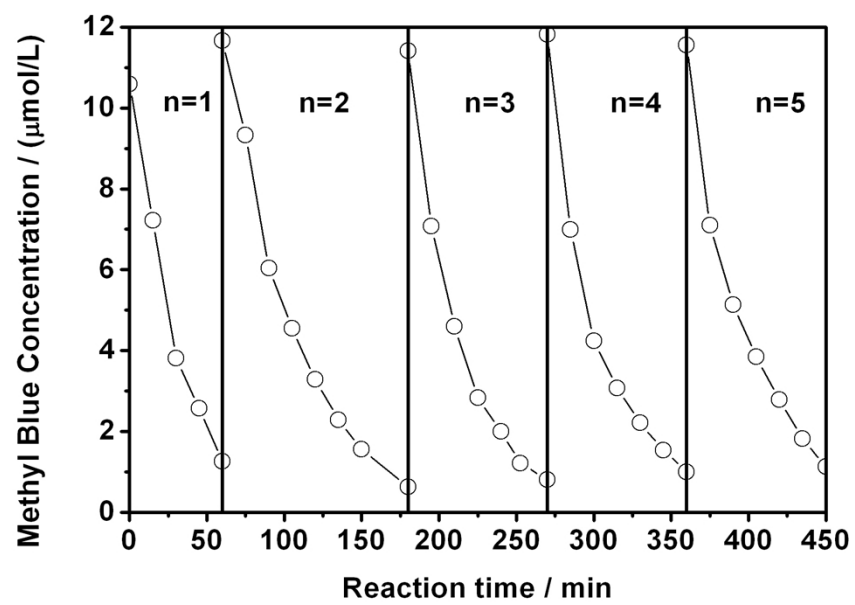

Supplement: c4cp01489h1.pdf [file c4cp01489h1.pdf]
